# Supplementary material for: Community composition of root-associated fungi in a Quercus-dominated temperate forest: “codominance” of mycorrhizal and root-endophytic fungi
Source: PubMed Central journal article supplement (PMC3678483; doi:10.1002/ece3.546), 2013-04-05
Supplement: ece30003-1281-SD9.pdf [file ece30003-1281-SD9.pdf]

A

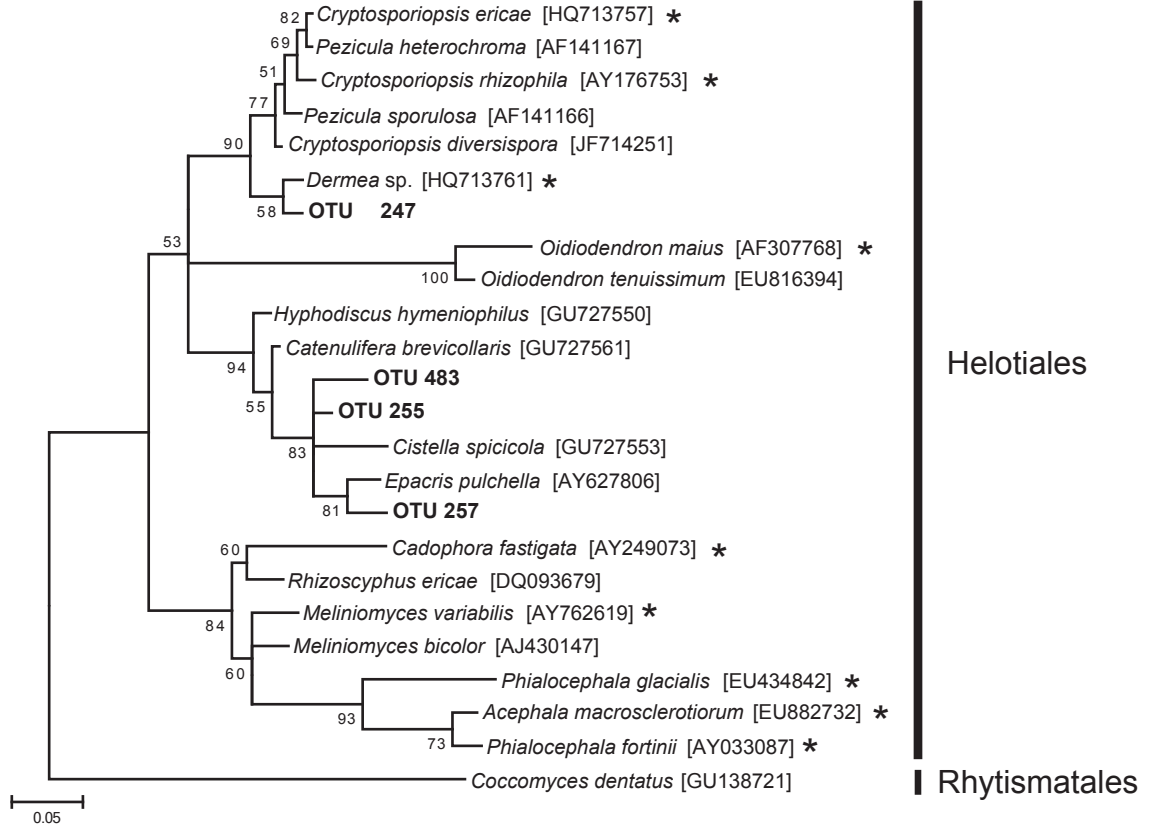

B

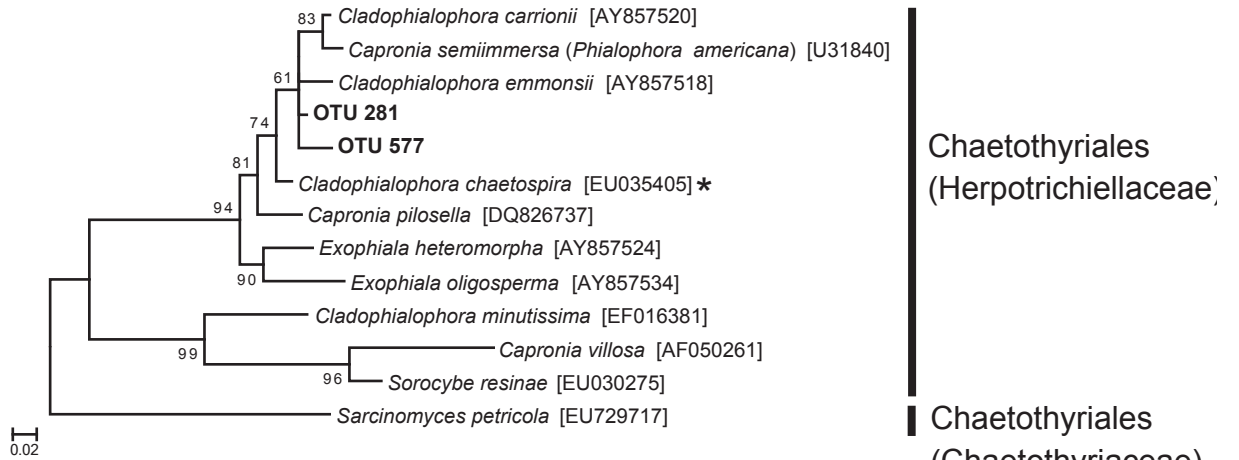

C

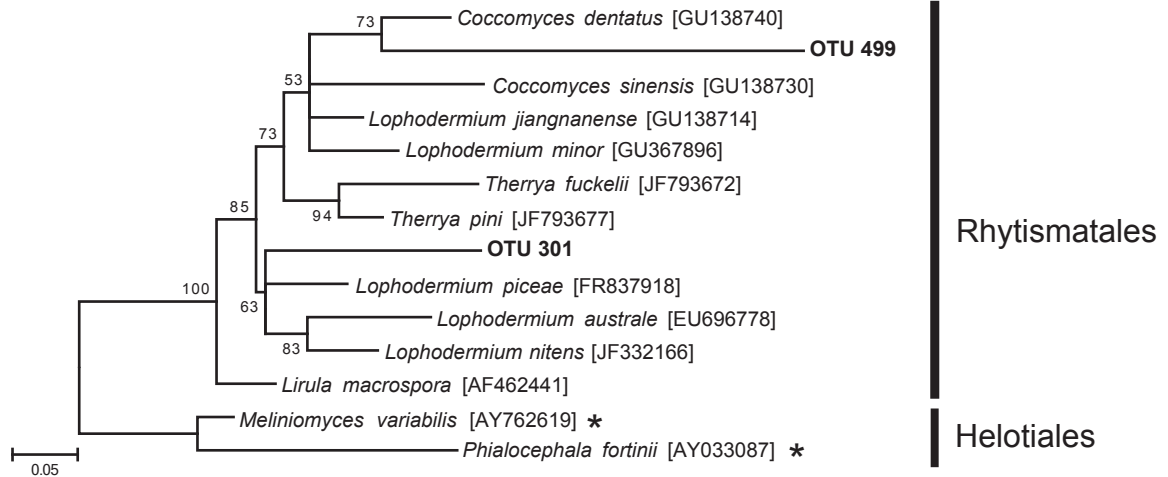

Fig. S3
